# Supplementary material
Source: PubMed Central journal article supplement (PMC6439656)
Supplement: jamasurg-154-126-s001.pdf [file jamasurg-154-126-s001.pdf]

## Supplementary Online Content

McAuliffe JC, Tang LH, Kamrani K, et al. Prevalence of False-Negative Results of Intraoperative Consultation on Surgical Margins During Resection of Gastric and Gastroesophageal Adenocarcinoma. *JAMA Surg*. Published online October 24, 2018. doi:10.1001/jamasurg.2018.3863

**eFigure 1.** Percentage of Negative Margins and Positive Margins by IOC vs Gross Distance From the Tumor at the Proximal Margin

**eFigure 2.** Percentage of Negative Margins and Positive Margins by IOC vs Gross Distance From the Tumor at the Distal Margin

This supplementary material has been provided by the authors to give readers additional information about their work.

**eFigure 1.** Percentage of Negative Margins and Positive Margins by IOC vs Gross Distance From the Tumor at the Proximal Margin

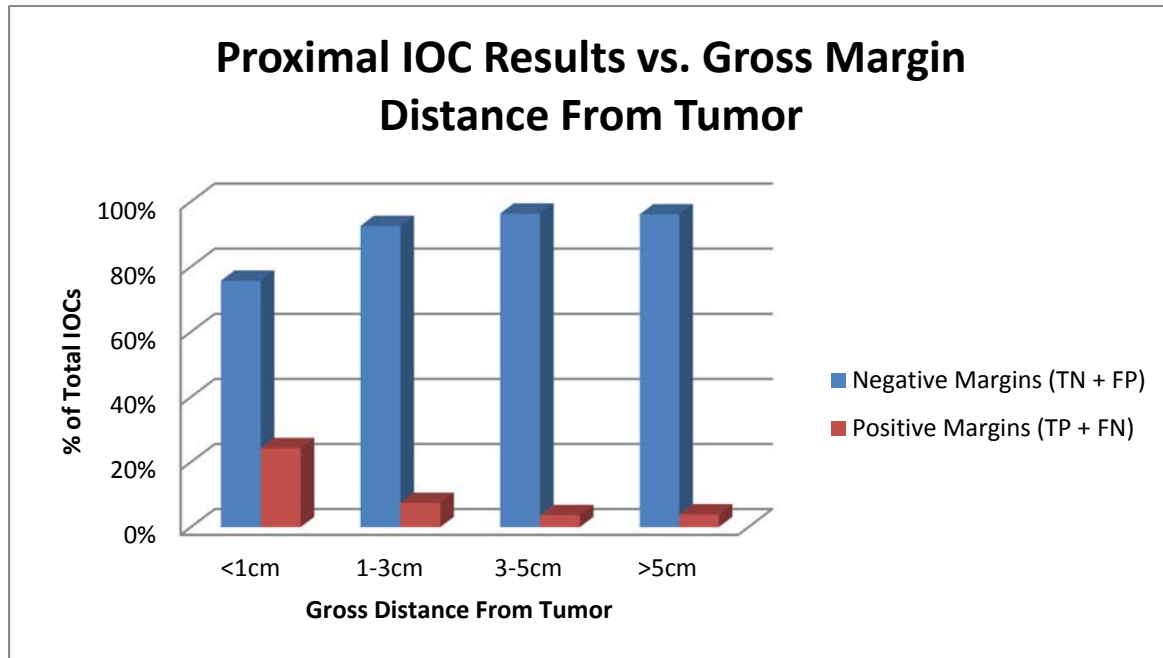

TN= true-negative, FP = false-negative, TP= true-positive, FN= false-negative. The further away from the gross tumor, the less common a positive (TP or FN) margin.

**eFigure 2.** Percentage of Negative Margins and Positive Margins by IOC vs Gross Distance From the Tumor at the Distal Margin

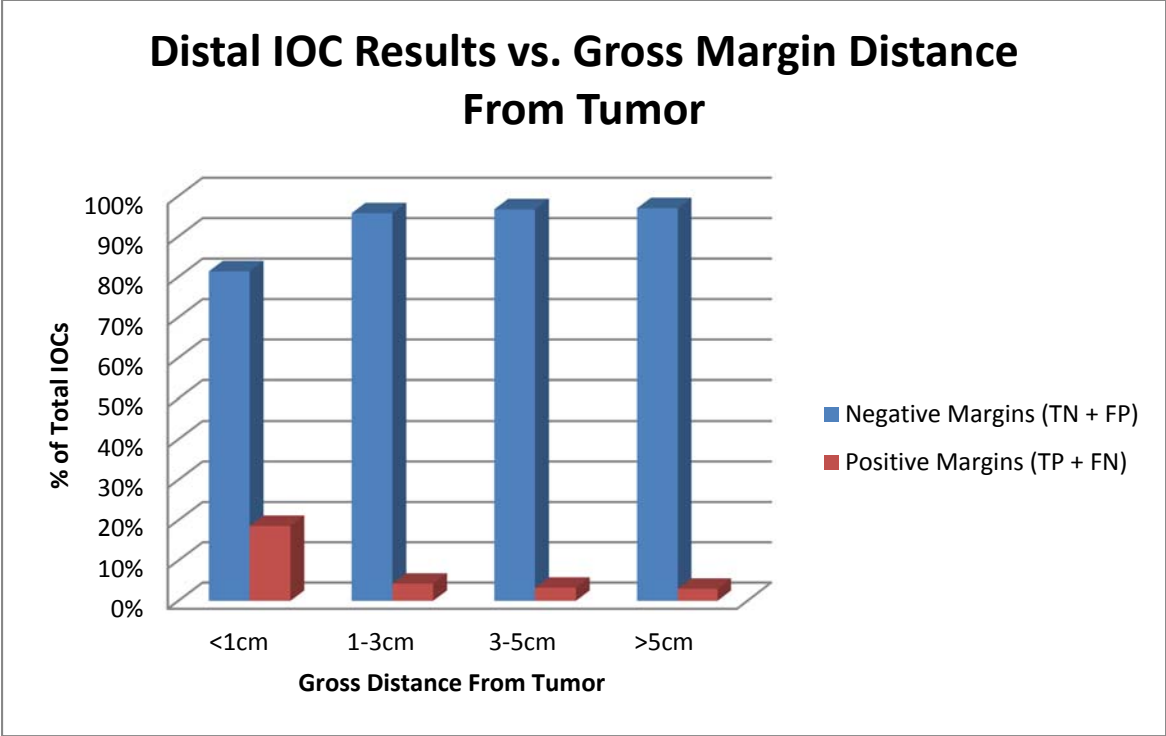

TN= true-negative, FP = false-negative, TP= true-positive, FN= false-negative. The further away from the gross tumor, the less common a positive (TP or FN) margin.
